# Supplementary material for: Diverging responses to threats across generations in zooplankton
Source: PubMed Central journal article supplement (PMC7685145; doi:10.1002/ecy.3145), 2020-08-19
Supplement: ECY-101-e03145-s001.pdf [file ECY-101-e03145-s001.pdf]

**Supporting Information.** Sha, Y., S. Tesson, and L.-A. Hansson 2020. Diverging responses to threats across generations in zooplankton. Ecology.

## Appendix S1

**Figure S1. Overview of the experimental design.** *Daphnia magna* individuals from the three clones were exposed to control (C: No UVR or fish cue), predation (P: No UVR but with fish cue) and UVR (U: UVR without fish cue), in isolation and in combination (PU: UVR with fish cue) for three generations (G1 to G3). Each generation of the three clones was exposed to all treatments.

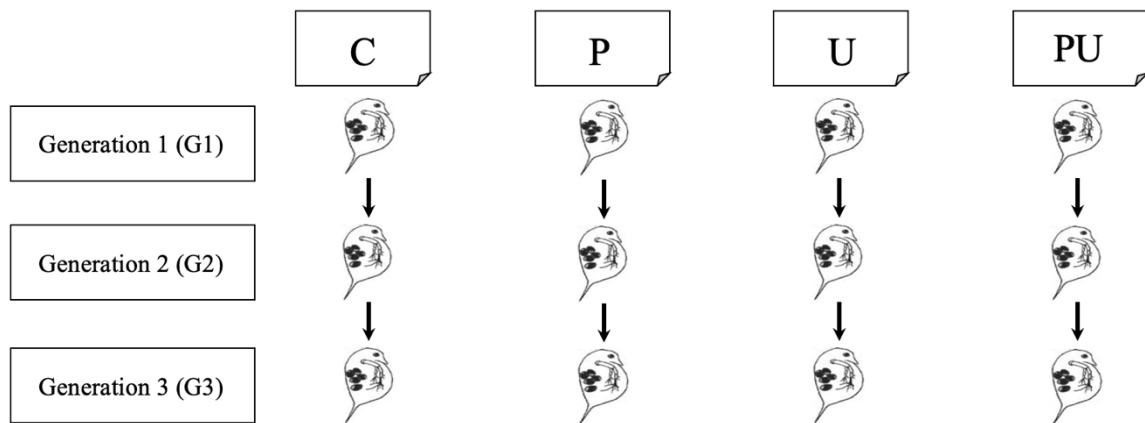

**Figure S2. Ehippia formation.** Percentage of *D. magna* females with ehippia in the different treatments (control, predation, UVR and the combination of predation and UVR) from generation one to three (G1 to G3).

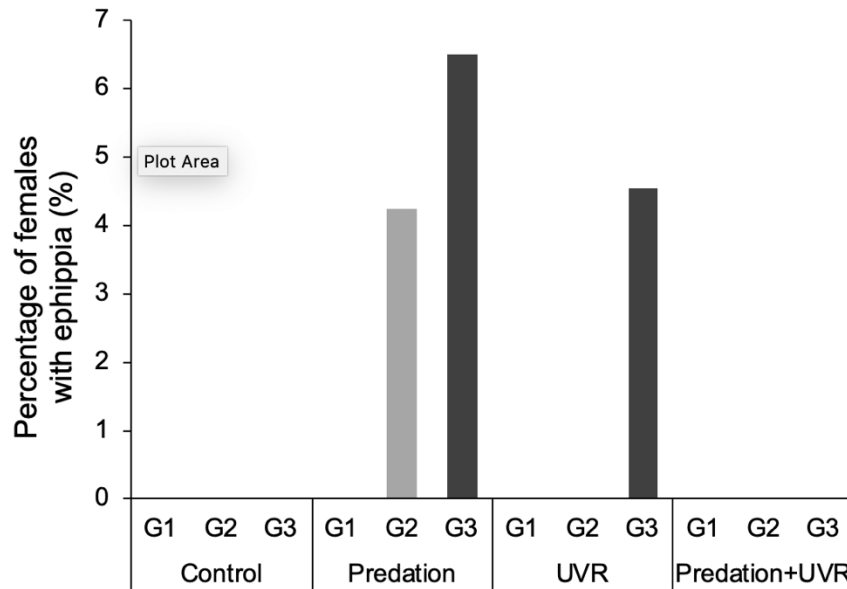

**Figure S3. Female age and clutch size.** Spearman correlations between the clutch size (i.e. total number of offspring produced from the first two clutches) and age of *D. magna* when clutch #2 was born for three generations (G1-G3). The results showed no significant relationship between the two variables, G1: Spearman  $r = 0.192$ ,  $p = 0.077$ ; G2: Spearman  $r = 0.063$ ,  $p = 0.399$ ; G3: Spearman  $r = 0.026$ ,  $p = 0.666$ .

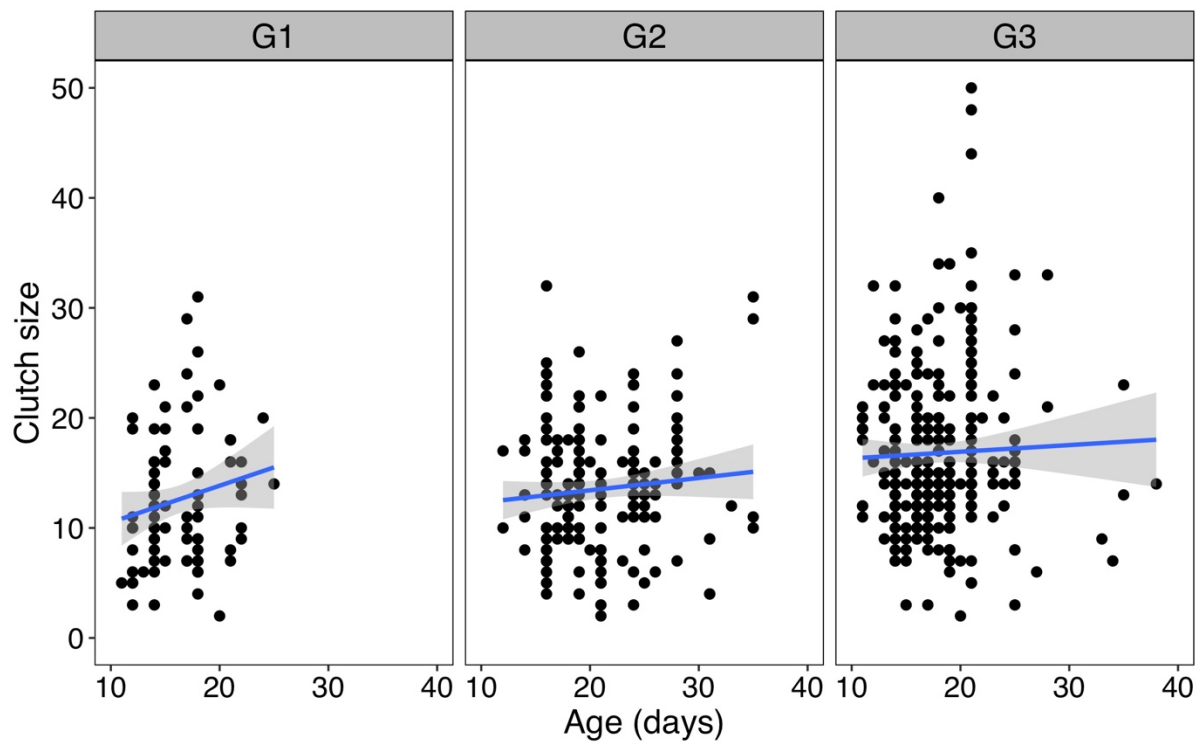

**Table S1.** Summary of morphology (body length), behavior (refuge demand and swimming speed) and reproduction (clutch size) over three generations for each treatment. Values are means ( $\pm 1$ SD). Number of replicates are given in parentheses. Clutch size is given as the total number of offspring from the first two clutches.

| Treatment     | Generation | Body length (mm)     | Refuge demand                | Swimming speed (mm/s) | Clutch size           |
|---------------|------------|----------------------|------------------------------|-----------------------|-----------------------|
| Control       | G1         | 3.27 $\pm$ 0.06 (8)  | 28571.18 $\pm$ 6104.14 (7)   | 21.46 $\pm$ 2.36 (7)  | 11.45 $\pm$ 4.30 (22) |
| Control       | G2         | 3.24 $\pm$ 0.12 (21) | 29318.69 $\pm$ 7455.34 (21)  | 20.95 $\pm$ 4.66 (21) | 12.44 $\pm$ 4.77 (39) |
| Control       | G3         | 3.16 $\pm$ 0.14 (40) | 25868.09 $\pm$ 5021.43 (38)  | 21.16 $\pm$ 4.12 (38) | 14.29 $\pm$ 5.49 (65) |
| Predation     | G1         | 3.32 $\pm$ 0.07 (9)  | 24932.12 $\pm$ 8060.00 (9)   | 19.10 $\pm$ 2.91 (9)  | 17.10 $\pm$ 5.42 (20) |
| Predation     | G2         | 3.04 $\pm$ 0.20 (21) | 22656.81 $\pm$ 6742.32 (20)  | 20.17 $\pm$ 6.14 (20) | 13.89 $\pm$ 4.76 (47) |
| Predation     | G3         | 2.95 $\pm$ 0.22 (27) | 18606.58 $\pm$ 9416.24 (25)  | 20.95 $\pm$ 5.30 (25) | 17.06 $\pm$ 6.80 (77) |
| UVR           | G1         | 3.30 $\pm$ 0.09 (8)  | 15778.64 $\pm$ 5651.68 (6)   | 15.30 $\pm$ 1.27 (6)  | 8.56 $\pm$ 4.07 (16)  |
| UVR           | G2         | 3.23 $\pm$ 0.11 (21) | 14827.03 $\pm$ 10041.89 (17) | 16.99 $\pm$ 3.78 (17) | 11.23 $\pm$ 5.27 (39) |
| UVR           | G3         | 3.29 $\pm$ 0.17 (38) | 12634.05 $\pm$ 7240.01 (24)  | 18.06 $\pm$ 6.71 (24) | 16.03 $\pm$ 8.18 (66) |
| Predation+UVR | G1         | 3.30 $\pm$ 0.11 (8)  | 18752.19 $\pm$ 12129.91 (8)  | 17.04 $\pm$ 3.19 (8)  | 12.50 $\pm$ 6.55 (28) |
| Predation+UVR | G2         | 3.24 $\pm$ 0.12 (16) | 18132.33 $\pm$ 10433.77 (16) | 18.64 $\pm$ 4.92 (16) | 15.70 $\pm$ 6.44 (54) |
| Predation+UVR | G3         | 3.19 $\pm$ 0.19 (28) | 14213.44 $\pm$ 10086.86 (25) | 19.01 $\pm$ 4.45 (25) | 19.24 $\pm$ 8.14 (80) |

**Table S2. Further pairwise comparisons, body length of *Daphnia magna*.** Tukey's post hoc tests were run following the linear mixed effect models to compare 1) changes in body length over three generations for each treatment and 2) differences in body length among treatments for each generation. Bold font indicates significant results ( $p < 0.05$ ).

| Contrast                                                                | Estimate | t-ratio | <i>p</i>         |
|-------------------------------------------------------------------------|----------|---------|------------------|
| <b>Changes in body length over three generations for each treatment</b> |          |         |                  |
| Treatment = Control                                                     |          |         |                  |
| G1 - G2                                                                 | 0.026    | 0.406   | 0.913            |
| G1 - G3                                                                 | 0.099    | 1.659   | 0.223            |
| G2 - G3                                                                 | 0.073    | 1.759   | 0.186            |
| Treatment = Predation                                                   |          |         |                  |
| G1 - G2                                                                 | 0.266    | 4.314   | <b>&lt;.0001</b> |
| G1 - G3                                                                 | 0.369    | 6.192   | <b>&lt;.0001</b> |
| G2 - G3                                                                 | 0.104    | 2.292   | 0.059            |
| Treatment = UVR                                                         |          |         |                  |
| G1 - G2                                                                 | 0.073    | 1.132   | 0.496            |
| G1 - G3                                                                 | 0.019    | 0.320   | 0.945            |
| G2 - G3                                                                 | -0.053   | -1.270  | 0.414            |
| Treatment = Predation+UVR                                               |          |         |                  |
| G1 - G2                                                                 | 0.057    | 0.851   | 0.672            |
| G1 - G3                                                                 | 0.106    | 1.710   | 0.204            |
| G2 - G3                                                                 | 0.049    | 1.008   | 0.573            |
| <b>Differences in body length among treatments for each generation</b>  |          |         |                  |
| Generation 1                                                            |          |         |                  |
| Control - Predation                                                     | -0.040   | -0.533  | 0.951            |
| Control - UVR                                                           | -0.025   | -0.320  | 0.989            |
| Control - Predation+UVR                                                 | -0.026   | -0.339  | 0.987            |
| Predation - UVR                                                         | 0.015    | 0.204   | 0.997            |
| Predation - Predation+UVR                                               | 0.014    | 0.184   | 0.998            |
| UVR - Predation+UVR                                                     | -0.001   | -0.019  | 1.000            |
| Generation 2                                                            |          |         |                  |
| Control - Predation                                                     | -0.040   | -0.533  | 0.951            |
| Control - UVR                                                           | -0.025   | -0.320  | 0.989            |
| Control - Predation+UVR                                                 | -0.026   | -0.339  | 0.987            |
| Predation - UVR                                                         | 0.015    | 0.204   | 0.997            |
| Predation - Predation+UVR                                               | 0.014    | 0.184   | 0.998            |
| UVR - Predation+UVR                                                     | -0.001   | -0.019  | 1.000            |
| Generation 3                                                            |          |         |                  |
| Control - Predation                                                     | 0.230    | 5.931   | <b>&lt;.0001</b> |
| Control - UVR                                                           | -0.105   | -2.958  | <b>0.018</b>     |
| Control - Predation+UVR                                                 | -0.020   | -0.514  | 0.956            |
| Predation - UVR                                                         | -0.335   | -8.586  | <b>&lt;.0001</b> |
| Predation - Predation+UVR                                               | -0.250   | -5.955  | <b>&lt;.0001</b> |
| UVR - Predation+UVR                                                     | 0.085    | 2.197   | 0.127            |

**Table S3. Further pairwise comparisons, refuge demand of *Daphnia magna*.** Tukey's post hoc tests were run following the linear mixed effect models to compare 1) changes in refuge demand over three generations for each treatment and 2) differences in refuge demand among treatments for each generation. Bold font indicates significant results ( $p < 0.05$ ).

| Contrast                                                                  | Estimate | t-ratio | <i>p</i>         |
|---------------------------------------------------------------------------|----------|---------|------------------|
| <b>Changes in refuge demand over three generations for each treatment</b> |          |         |                  |
| Treatment = Control                                                       |          |         |                  |
| G1 - G2                                                                   | -0.024   | -0.071  | 0.997            |
| G1 - G3                                                                   | 0.070    | 0.217   | 0.974            |
| G2 - G3                                                                   | 0.094    | 0.441   | 0.898            |
| Treatment = Predation                                                     |          |         |                  |
| G1 - G2                                                                   | 0.126    | 0.402   | 0.915            |
| G1 - G3                                                                   | 0.353    | 1.160   | 0.479            |
| G2 - G3                                                                   | 0.227    | 0.961   | 0.602            |
| Treatment = UVR                                                           |          |         |                  |
| G1 - G2                                                                   | 0.558    | 1.509   | 0.289            |
| G1 - G3                                                                   | 0.519    | 1.458   | 0.313            |
| G2 - G3                                                                   | -0.039   | -0.158  | 0.986            |
| Treatment = Predation+UVR                                                 |          |         |                  |
| G1 - G2                                                                   | -0.045   | -0.134  | 0.990            |
| G1 - G3                                                                   | 0.354    | 1.119   | 0.504            |
| G2 - G3                                                                   | 0.400    | 1.593   | 0.251            |
| <b>Differences in refuge demand among treatments for each generation</b>  |          |         |                  |
| Generation 1                                                              |          |         |                  |
| Control - Predation                                                       | 0.121    | 0.306   | 0.990            |
| Control - UVR                                                             | 0.469    | 1.073   | 0.707            |
| Control - Predation+UVR                                                   | 0.678    | 1.681   | 0.336            |
| Predation - UVR                                                           | 0.348    | 0.844   | 0.833            |
| Predation - Predation+UVR                                                 | 0.558    | 1.473   | 0.456            |
| UVR - Predation+UVR                                                       | 0.210    | 0.495   | 0.960            |
| Generation 2                                                              |          |         |                  |
| Control - Predation                                                       | 0.271    | 1.111   | 0.683            |
| Control - UVR                                                             | 1.051    | 4.092   | <b>&lt;.0001</b> |
| Control - Predation+UVR                                                   | 0.657    | 2.534   | 0.058            |
| Predation - UVR                                                           | 0.781    | 3.005   | <b>0.016</b>     |
| Predation - Predation+UVR                                                 | 0.386    | 1.476   | 0.454            |
| UVR - Predation+UVR                                                       | -0.394   | -1.434  | 0.480            |
| Generation 3                                                              |          |         |                  |
| Control - Predation                                                       | 0.404    | 1.999   | 0.192            |
| Control - UVR                                                             | 0.918    | 4.396   | <b>&lt;.0001</b> |
| Control - Predation+UVR                                                   | 0.963    | 4.799   | <b>&lt;.0001</b> |
| Predation - UVR                                                           | 0.515    | 2.288   | 0.104            |
| Predation - Predation+UVR                                                 | 0.559    | 2.523   | 0.060            |
| UVR - Predation+UVR                                                       | 0.045    | 0.195   | 0.997            |

**Table S4. Further pairwise comparisons, swimming speed of *Daphnia magna*.** Tukey's post hoc tests were run following the linear mixed effect models to compare 1) changes in speed over three generations for each treatment and 2) differences in speed among treatments for each generation. Bold font indicates significant results ( $p < 0.05$ ).

| Contrast                                                          | Estimate | t-ratio | <i>p</i> |
|-------------------------------------------------------------------|----------|---------|----------|
| <b>Changes in speed over three generations for each treatment</b> |          |         |          |
| Treatment = Control                                               |          |         |          |
| G1 - G2                                                           | 0.480    | 0.229   | 0.972    |
| G1 - G3                                                           | 0.280    | 0.142   | 0.989    |
| G2 - G3                                                           | -0.200   | -0.153  | 0.987    |
| Treatment = Predation                                             |          |         |          |
| G1 - G2                                                           | -0.989   | -0.513  | 0.865    |
| G1 - G3                                                           | -1.862   | -0.996  | 0.580    |
| G2 - G3                                                           | -0.873   | -0.603  | 0.819    |
| Treatment = UVR                                                   |          |         |          |
| G1 - G2                                                           | -1.665   | -0.730  | 0.746    |
| G1 - G3                                                           | -2.802   | -1.277  | 0.410    |
| G2 - G3                                                           | -1.138   | -0.747  | 0.736    |
| Treatment = Predation+UVR                                         |          |         |          |
| G1 - G2                                                           | -1.587   | -0.763  | 0.726    |
| G1 - G3                                                           | -1.923   | -0.985  | 0.587    |
| G2 - G3                                                           | -0.336   | -0.218  | 0.974    |
| <b>Differences in speed among treatments for each generation</b>  |          |         |          |
| Generation 1                                                      |          |         |          |
| Control - Predation                                               | 2.251    | 0.930   | 0.789    |
| Control - UVR                                                     | 5.934    | 2.213   | 0.123    |
| Control - Predation+UVR                                           | 4.355    | 1.752   | 0.300    |
| Predation - UVR                                                   | 3.683    | 1.452   | 0.468    |
| Predation - Predation+UVR                                         | 2.104    | 0.902   | 0.804    |
| UVR - Predation+UVR                                               | -1.580   | -0.608  | 0.930    |
| Generation 2                                                      |          |         |          |
| Control - Predation                                               | 0.782    | 0.521   | 0.954    |
| Control - UVR                                                     | 3.790    | 2.407   | 0.079    |
| Control - Predation+UVR                                           | 2.288    | 1.434   | 0.480    |
| Predation - UVR                                                   | 3.008    | 1.890   | 0.236    |
| Predation - Predation+UVR                                         | 1.506    | 0.934   | 0.786    |
| UVR - Predation+UVR                                               | -1.502   | -0.892  | 0.809    |
| Generation 3                                                      |          |         |          |
| Control - Predation                                               | 0.109    | 0.088   | 1.000    |
| Control - UVR                                                     | 2.852    | 2.247   | 0.114    |
| Control - Predation+UVR                                           | 2.152    | 1.741   | 0.306    |
| Predation - UVR                                                   | 2.743    | 1.988   | 0.196    |
| Predation - Predation+UVR                                         | 2.043    | 1.500   | 0.440    |
| UVR - Predation+UVR                                               | -0.700   | -0.504  | 0.958    |

**Table S5. Further pairwise comparisons, clutch size of *Daphnia magna*.** Tukey's post hoc tests were run following the linear mixed effect models to compare 1) changes in clutch size over three generations for each treatment and 2) differences in clutch size among treatments for each generation. Bold font indicates significant results ( $p < 0.05$ ).

| Contrast                                                                | Estimate | t-ratio | <i>p</i>         |
|-------------------------------------------------------------------------|----------|---------|------------------|
| <b>Changes in clutch size over three generations for each treatment</b> |          |         |                  |
| Treatment = Control                                                     |          |         |                  |
| G1 - G2                                                                 | -0.120   | -0.560  | 0.842            |
| G1 - G3                                                                 | -0.341   | -1.719  | 0.199            |
| G2 - G3                                                                 | -0.221   | -1.352  | 0.367            |
| Treatment = Predation                                                   |          |         |                  |
| G1 - G2                                                                 | 0.460    | 2.145   | 0.082            |
| G1 - G3                                                                 | 0.041    | 0.206   | 0.977            |
| G2 - G3                                                                 | -0.418   | -2.814  | <b>0.014</b>     |
| Treatment = UVR                                                         |          |         |                  |
| G1 - G2                                                                 | -0.413   | -1.734  | 0.194            |
| G1 - G3                                                                 | -1.061   | -4.741  | <b>&lt;.0001</b> |
| G2 - G3                                                                 | -0.648   | -3.995  | <b>&lt;.0001</b> |
| Treatment = Predation+UVR                                               |          |         |                  |
| G1 - G2                                                                 | -0.421   | -2.246  | 0.065            |
| G1 - G3                                                                 | -0.873   | -4.949  | <b>&lt;.0001</b> |
| G2 - G3                                                                 | -0.451   | -3.185  | <b>0.004</b>     |
| <b>Differences in clutch size among treatments for each generation</b>  |          |         |                  |
| Generation 1                                                            |          |         |                  |
| Control - Predation                                                     | -0.730   | -2.933  | <b>0.018</b>     |
| Control - UVR                                                           | 0.494    | 1.870   | 0.242            |
| Control - Predation+UVR                                                 | -0.080   | -0.349  | 0.985            |
| Predation - UVR                                                         | 1.224    | 4.549   | <b>&lt;.0001</b> |
| Predation - Predation+UVR                                               | 0.650    | 2.761   | <b>0.030</b>     |
| UVR - Predation+UVR                                                     | -0.574   | -2.279  | 0.104            |
| Generation 2                                                            |          |         |                  |
| Control - Predation                                                     | -0.150   | -0.861  | 0.825            |
| Control - UVR                                                           | 0.201    | 1.108   | 0.685            |
| Control - Predation+UVR                                                 | -0.381   | -2.258  | 0.109            |
| Predation - UVR                                                         | 0.351    | 2.015   | 0.184            |
| Predation - Predation+UVR                                               | -0.231   | -1.444  | 0.473            |
| UVR - Predation+UVR                                                     | -0.582   | -3.449  | <b>0.003</b>     |
| Generation 3                                                            |          |         |                  |
| Control - Predation                                                     | -0.348   | -2.567  | 0.051            |
| Control - UVR                                                           | -0.226   | -1.606  | 0.376            |
| Control - Predation+UVR                                                 | -0.612   | -4.549  | <b>&lt;.0001</b> |
| Predation - UVR                                                         | 0.122    | 0.901   | 0.804            |
| Predation - Predation+UVR                                               | -0.264   | -2.060  | 0.168            |
| UVR - Predation+UVR                                                     | -0.386   | -2.889  | <b>0.021</b>     |
